# Supplementary material for: An ultrathin support layer based on carbon nanotubes/polyvinyl alcohol for forward osmosis membranes with outstanding water flux
Source: Royal Society of Chemistry journal article supplement (doi:10.1039/d4ta04572f), 2024-01-01
Supplement: d4ta04572f1.pdf [file d4ta04572f1.pdf]

## Supporting Information

### **An ultrathin support layer based on carbon nanotubes/polyvinyl alcohol for forward osmosis membranes with outstanding water flux**

Hsi-Yuan Juan<sup>a</sup>, Shivam Gupta<sup>a</sup>, Chi-Young Lee<sup>a</sup>, Yi-Ting Lai<sup>\*b,c,d</sup>, and Nyan-Hwa Tai<sup>\*a,e</sup>

<sup>a</sup>Department of Materials Science and Engineering,

National Tsing Hua University Hsinchu, 300, Taiwan, ROC.

<sup>b</sup>Department of Materials Engineering, <sup>c</sup>Center for Plasma and Thin Film Technologies,

<sup>d</sup>Biochemical Technology R&D Center, Ming Chi University of Technology,

New Taipei City, 24301, Taiwan, ROC.

<sup>e</sup>Institute of Analytical and Environmental Science,

National Tsing Hua University Hsinchu, 300, Taiwan, ROC.

Corresponding author E-mail:

laieating@mail.mcut.edu.tw (Prof. Yi-Ting Lai)

nhtai@mx.nthu.edu.tw (Prof. Nyan-Hwa Tai)

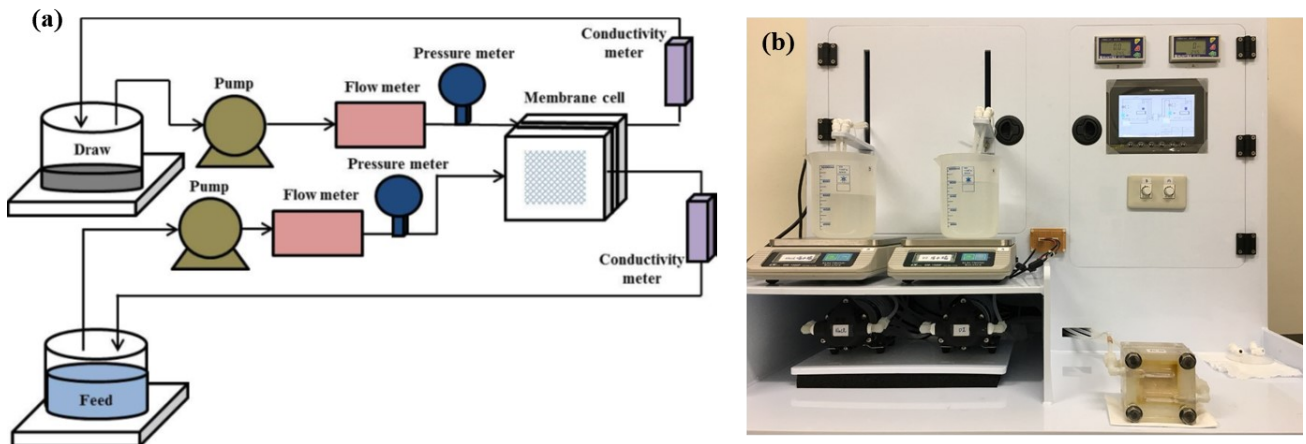

**Fig. S 1** (a) The schematic diagram and (b) photo of proposed lab-scale cross flow setup for the FO testing system.

**Table S 1** The calculated mechanical properties of the TCF membranes.

|                 | Young's modulus (MPa) | Tensile strength (MPa) | Elongation (%) |
|-----------------|-----------------------|------------------------|----------------|
| $V_0$ (CNTs)    | 1076                  | 13.69                  | 1.57           |
| $V_{0.25}$      | 1032                  | 25.58                  | 4.38           |
| $V_{0.5}$       | 735                   | 11.91                  | 3.39           |
| $V_{0.75}$      | 805                   | 9.14                   | 1.3            |
| $V_{0.25}$ -D70 | 1514                  | 31.52                  | 4.67           |

\*  $V_x$ : x represents the PVA concentration in CNTs/PVA dispersion (wt%). Dy: y presents the addition of PDA dispersion (mL).

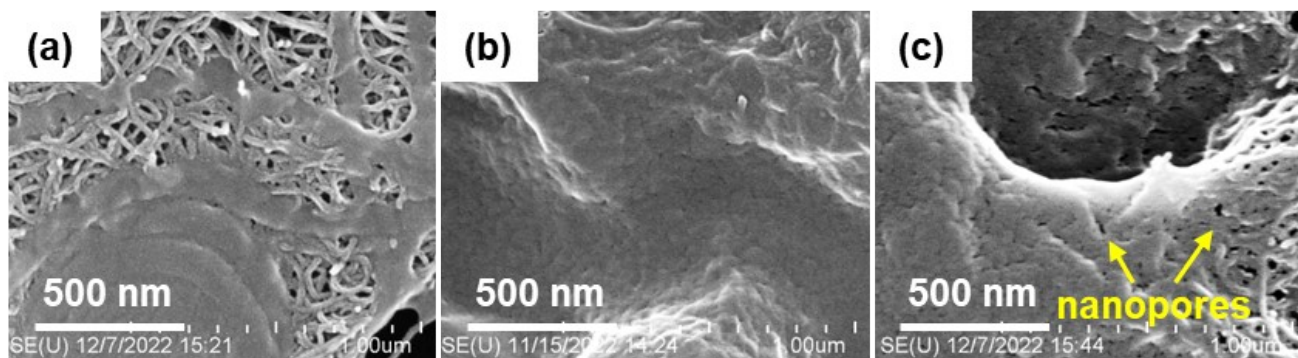

**Fig. S 2** FESEM images of the CNTs/PVA support layers containing PVA with concentrations of (a) 0.25 wt%, (b) 0.5 wt%, and (c) 0.75 wt%. The yellow arrows point out the formation of nanopores.

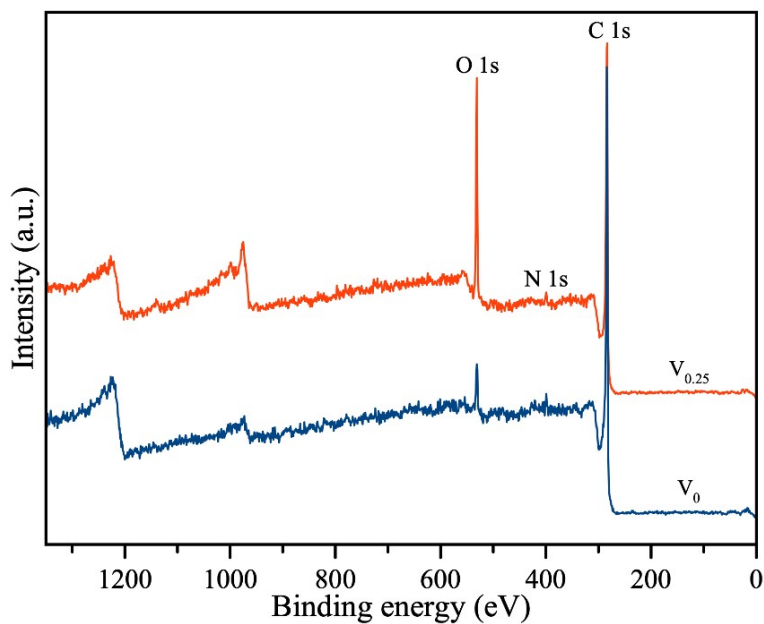

**Fig. S 3** XPS survey spectra of the  $V_0$  and  $V_{0.25}$  support layer. The presence of the small nitrogen peak is caused by the residual surfactant in CNTs dispersion.

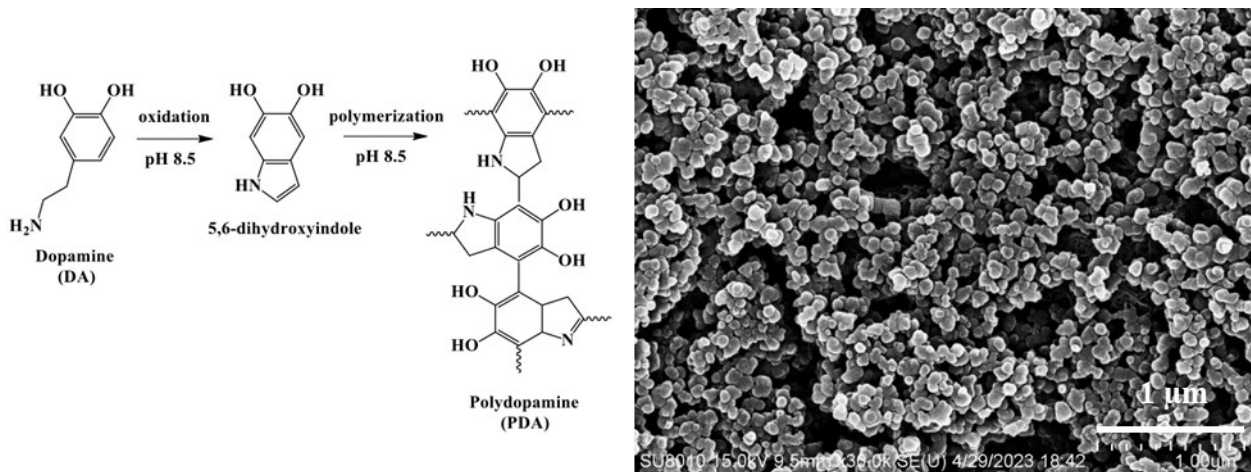

**Fig. S 4** The polymerization of PDA and the uniformly distributed PDA nanoparticles on  $V_{0.25}$ -D70 surface.

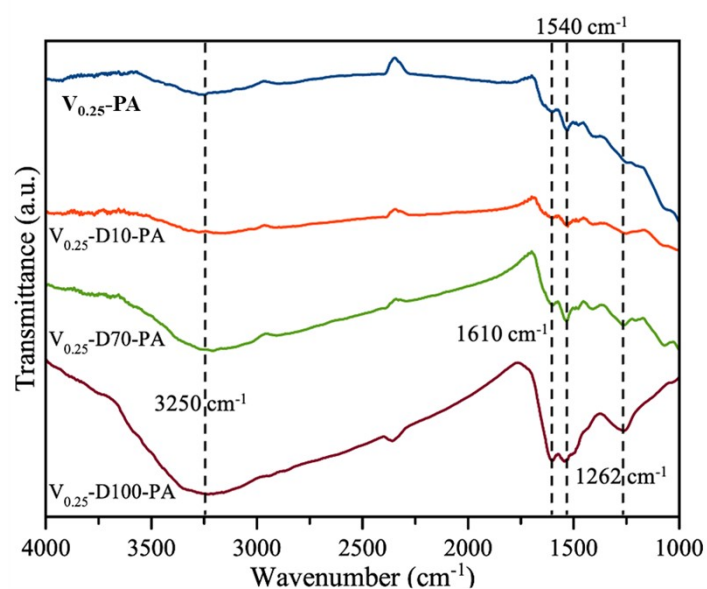

**Fig. S 5** The FTIR spectra of the  $V_{0.25}$ -Dy-PA TFC membranes.

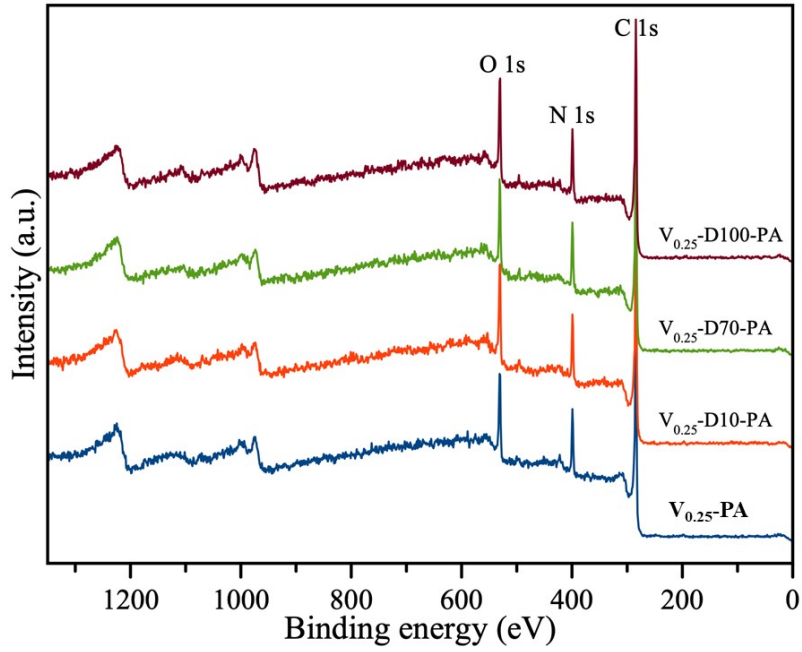

**Fig. S 6** The XPS spectra of  $V_{0.25}$ -Dy-PA TFC membranes.

**Table S 2** The FO performance of the proposed  $V_{0.25}$ -Dy-PA TFC membranes.

| Samples                             | Jw (LMH)                           | Js/Jw (g/L)                       |
|-------------------------------------|------------------------------------|-----------------------------------|
| $V_{0.25}$ -(D0)-PA                 | $18.77 \pm 0.82$                   | $2.77 \pm 0.22$                   |
| $V_{0.25}$ -D10-PA                  | $24.30 \pm 3.17$                   | $1.29 \pm 0.07$                   |
| $V_{0.25}$ -D30-PA                  | $35.31 \pm 3.54$                   | $1.13 \pm 0.12$                   |
| $V_{0.25}$ -D50-PA                  | $53.56 \pm 5.17$                   | $0.40 \pm 0.05$                   |
| <b><math>V_{0.25}</math>-D70-PA</b> | <b><math>90.86 \pm 8.01</math></b> | <b><math>0.22 \pm 0.02</math></b> |
| $V_{0.25}$ -D100-PA                 | $33.74 \pm 3.68$                   | $0.56 \pm 0.04$                   |

**Table S 3** Comparison of the A, B, and S values of the composite membrane in this study with those from other studies [1].

| <b>Membrane</b>                | <b>A</b><br>(L m <sup>-2</sup> h <sup>-1</sup> bar <sup>-1</sup> ) | <b>B</b><br>(L m <sup>-2</sup> h <sup>-1</sup> ) | <b>S</b><br>(μm) | <b>Reference</b> |
|--------------------------------|--------------------------------------------------------------------|--------------------------------------------------|------------------|------------------|
| <b>V<sub>0.25</sub>-D70-PA</b> | <b>4.93</b>                                                        | <b>1.07</b>                                      | <b>58.7</b>      | <b>This work</b> |
| eTFC-NC2                       | 5.44                                                               | 0.52                                             | 192              | [2]              |
| PAN1500                        | 1.56                                                               | 0.35                                             | 163              | [3]              |
| AQP-TFC-HF-<br>PEI             | 3.66                                                               | 0.31                                             | 172              | [4]              |
| HTI CA                         | 0.67                                                               | 0.40                                             | 678              | [5]              |

## Reference

1. Tiraferri, A., et al., *A method for the simultaneous determination of transport and structural parameters of forward osmosis membranes*. Journal of Membrane Science, 2013. **444**: p. 523-538.
2. Li, B., et al., *High performance electrospun thin-film composite forward osmosis membrane by tailoring polyamide active layer with polydopamine interlayer for desulfurization wastewater desalination*. Desalination, 2022. **534**: p. 115781.
3. Han, C., et al., *Improved performance of thin-film composite membrane supported by aligned nanofibers substrate with slit-shape pores for forward osmosis*. Journal of Membrane Science, 2020. **612**: p. 118447.
4. Li, X., et al., *Fabrication of a robust high-performance FO membrane by optimizing substrate structure and incorporating aquaporin into selective layer*. Journal of Membrane Science, 2017. **525**: p. 257-268.
5. Ren, J. and J.R. McCutcheon, *A new commercial thin film composite membrane for forward osmosis*. Desalination, 2014. **343**: p. 187-193.
